# Supplementary material
Source: PubMed Central journal article supplement (PMC3667425)
Supplement: Supp_Data.pdf [file Supp_Data.pdf]

Supplement for CORaL: Comparison of Ranked Lists for Analysis of Gene Expression Data, by Antosh et al.

Table of Contents:

|                                                              |   |
|--------------------------------------------------------------|---|
| Diagnostic Plot Verification of Simulation Method            | 1 |
| Illustration of Simulation Method                            | 2 |
| Example Diagnostic Plot for Realistic Noise Simulations      | 2 |
| Overlaps for Pearson Data in All 3 Algorithms                | 3 |
| Pearson Overlaps Correlation and Significance of Correlation | 5 |
| Psuedo Code For CORaL                                        | 8 |
| Replacement R Code for Plaisier Simulations                  | 8 |

Diagnostic Plot Verification of Simulation Method

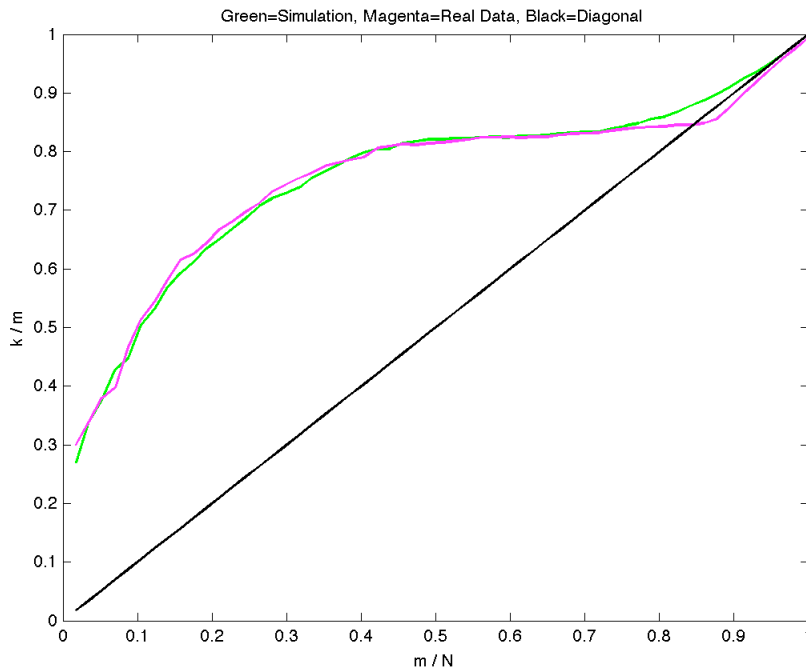

Diagnostic Plot is: for a given set size  $m$ , the overlap in the top  $m$  elements of each ranked list ( $k$ ) divided by  $m$  versus  $m$  divided by the total list length  $N$ . We used a 1-

dimensional ( $m=n$ ) approach as in Antosh et al. (2011) to represent the data because it is easier to visualize.

### Illustration of Simulation Method

Start:

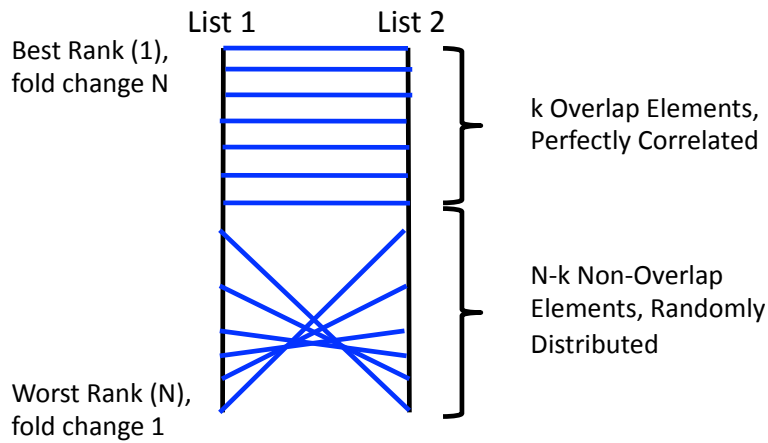

Then, subtract from each fold change the absolute value of a number drawn from  $N(0, \sigma)$ , where  $\sigma$  is a parameter of the simulation

### Example Diagnostic Plot for Realistic Noise Simulations

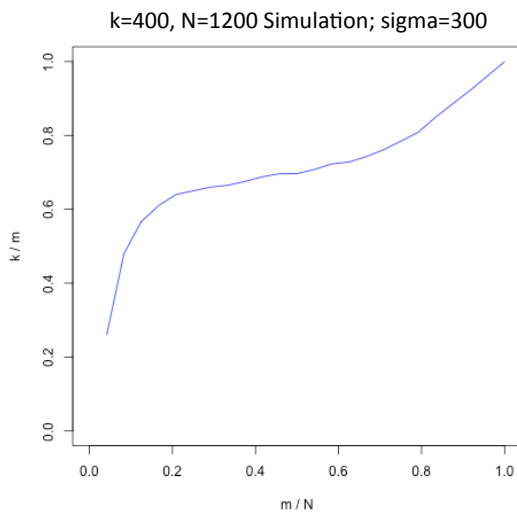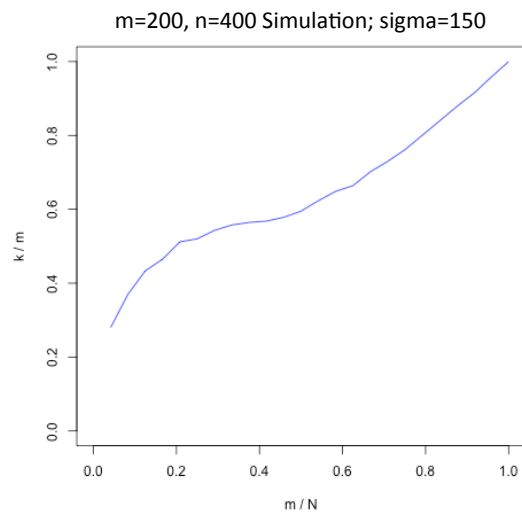

Compare these plots with the real data diagnostic figure on page 1. The desired output is to have no significant decreases in (k/m) with increasing (m/N).

Overlaps for Pearson Data in All 3 Algorithms:

Note: “resv” is resveratrol, “DR” is dietary restriction

*Yang et al. (2006) Method OrderedList:*

|                  | fat DR | fat high resv | fat low resv | heart DR | heart high resv | heart low resv | liver DR | liver high resv | liver low resv | muscle DR | muscle high resv |
|------------------|--------|---------------|--------------|----------|-----------------|----------------|----------|-----------------|----------------|-----------|------------------|
| fat high resv    | 0      |               |              |          |                 |                |          |                 |                |           |                  |
| fat low resv     | 0      | 0             |              |          |                 |                |          |                 |                |           |                  |
| heart DR         | 0      | 0             | 0            |          |                 |                |          |                 |                |           |                  |
| heart high resv  | 0      | 0             | 0            | 0        |                 |                |          |                 |                |           |                  |
| heart low resv   | 0      | 0             | 0            | 0        | 0               |                |          |                 |                |           |                  |
| liver DR         | 149    | 0             | 13           | 0        | 0               | 0              |          |                 |                |           |                  |
| liver high resv  | 103    | 0             | 0            | 0        | 0               | 0              | 1090     |                 |                |           |                  |
| liver low resv   | 35     | 0             | 0            | 0        | 0               | 0              | 0        | 0               |                |           |                  |
| muscle DR        | 0      | 0             | 0            | 0        | 0               | 0              | 191      | 0               | 0              |           |                  |
| muscle high resv | 211    | 146           | 255          | 0        | 0               | 14             | 37       | 0               | 13             | 0         |                  |
| muscle low resv  | 0      | 0             | 0            | 0        | 0               | 0              | 0        | 0               | 0              | 0         | 0                |

*Plaisier et al. Method Rank-Rank Hypergeometric Overlap (RRHO):*

|                  | fat DR | fat high resv | fat low resv | heart DR | heart high resv | heart low resv | liver DR | liver high resv | liver low resv | muscle DR | muscle high resv |
|------------------|--------|---------------|--------------|----------|-----------------|----------------|----------|-----------------|----------------|-----------|------------------|
| fat high resv    | 11205  |               |              |          |                 |                |          |                 |                |           |                  |
| fat low resv     | 11115  | 11111         |              |          |                 |                |          |                 |                |           |                  |
| heart DR         | 1970   | 1617          | 2306         |          |                 |                |          |                 |                |           |                  |
| heart high resv  | 341    | 646           | 56           | 8573     |                 |                |          |                 |                |           |                  |
| heart low resv   | 698    | 416           | 20           | 8451     | 10398           |                |          |                 |                |           |                  |
| liver DR         | 4906   | 5582          | 1209         | 2770     | 3151            | 919            |          |                 |                |           |                  |
| liver high resv  | 3804   | 1046          | 638          | 2837     | 3288            | 708            | 12729    |                 |                |           |                  |
| liver low resv   | 1079   | 1105          | 993          | 1467     | 1382            | 2286           | 9003     | 8363            |                |           |                  |
| muscle DR        | 1274   | 0             | 21           | 1358     | 1760            | 1328           | 2387     | 2380            | 797            |           |                  |
| muscle high resv | 261    | 458           | 294          | 15       | 2257            | 118            | 38       | 917             | 363            | 9331      |                  |
| muscle low resv  | 0      | 0             | 0            | 0        | 2032            | 2070           | 891      | 766             | 1514           | 9132      | 9985             |

*Antosh et al. Method CORaL:*

|                  | fat DR | fat high resv | fat low resv | heart DR | heart high resv | heart low resv | liver DR | liver high resv | liver low resv | muscle DR | muscle high resv |
|------------------|--------|---------------|--------------|----------|-----------------|----------------|----------|-----------------|----------------|-----------|------------------|
| fat high resv    | 5462   |               |              |          |                 |                |          |                 |                |           |                  |
| fat low resv     | 6506   | 6976          |              |          |                 |                |          |                 |                |           |                  |
| heart DR         | 21     | 0             | 7            |          |                 |                |          |                 |                |           |                  |
| heart high resv  | 0      | 9             | 0            | 76       |                 |                |          |                 |                |           |                  |
| heart low resv   | 14     | 0             | 14           | 42       | 2277            |                |          |                 |                |           |                  |
| liver DR         | 202    | 0             | 110          | 24       | 0               | 10             |          |                 |                |           |                  |
| liver high resv  | 111    | 8             | 18           | 7        | 24              | 0              | 5852     |                 |                |           |                  |
| liver low resv   | 23     | 0             | 13           | 0        | 0               | 10             | 781      | 2743            |                |           |                  |
| muscle DR        | 27     | 0             | 19           | 28       | 17              | 8              | 32       | 13              | 8              |           |                  |
| muscle high resv | 193    | 36            | 134          | 10       | 24              | 31             | 35       | 19              | 11             | 2829      |                  |
| muscle low resv  | 0      | 0             | 0            | 14       | 61              | 24             | 0        | 0               | 0              | 2110      | 4294             |

Pearson Overlaps Correlation and Significance of Correlation

Results of CORaL Analysis on Pearson Data

DR stands for dietary restriction, highRes and lowRes stand for high and low doses of resveratrol

The four tissues measured are fat, heart, liver, and muscle

Correlation is spearman correlation, statistical significance was tested using the cor.test function in R with option exact=FALSE

**All overlaps greater than 35 genes in either direction have a correlation with statistical significance p value less than 0.05**

| Condition 1     | Condition 2      | Overlap<br>Up | Correlation<br>Up | Correlation<br>p Value Up | Overlap<br>Down | Correlation<br>Down | Correlation<br>p Value<br>Down |
|-----------------|------------------|---------------|-------------------|---------------------------|-----------------|---------------------|--------------------------------|
| fat DR          | fat high resv    | 2562          | 0.63              | 7.7E-287                  | 2900            | 0.48                | 5.0E-165                       |
| fat DR          | fat low resv     | 2921          | 0.63              | 0.0E+00                   | 3585            | 0.70                | 0.0E+00                        |
| fat DR          | heart DR         | 0             | 0.00              | 1.0E+00                   | 21              | 0.19                | 4.1E-01                        |
| fat DR          | heart high resv  | 0             | 0.00              | 1.0E+00                   | 0               | 0.00                | 1.0E+00                        |
| fat DR          | heart low resv   | 0             | 0.00              | 1.0E+00                   | 14              | 0.07                | 8.1E-01                        |
| fat DR          | liver DR         | 14            | 0.26              | 3.7E-01                   | 188             | 0.36                | 4.6E-07                        |
| fat DR          | liver high resv  | 15            | 0.41              | 1.2E-01                   | 96              | 0.41                | 3.3E-05                        |
| fat DR          | liver low resv   | 11            | -0.03             | 9.4E-01                   | 12              | -0.05               | 8.8E-01                        |
| fat DR          | muscle DR        | 8             | -0.07             | 8.7E-01                   | 19              | -0.02               | 9.2E-01                        |
| fat DR          | muscle high resv | 0             | 0.00              | 1.0E+00                   | 193             | 0.31                | 1.1E-05                        |
| fat DR          | muscle low resv  | 0             | 0.00              | 1.0E+00                   | 0               | 0.00                | 1.0E+00                        |
| fat high resv   | fat low resv     | 3192          | 0.74              | 0.0E+00                   | 3784            | 0.63                | 0.0E+00                        |
| fat high resv   | heart DR         | 0             | 0.00              | 1.0E+00                   | 0               | 0.00                | 1.0E+00                        |
| fat high resv   | heart high resv  | 0             | 0.00              | 1.0E+00                   | 9               | -0.12               | 7.7E-01                        |
| fat high resv   | heart low resv   | 0             | 0.00              | 1.0E+00                   | 0               | 0.00                | 1.0E+00                        |
| fat high resv   | liver DR         | 0             | 0.00              | 1.0E+00                   | 0               | 0.00                | 1.0E+00                        |
| fat high resv   | liver high resv  | 0             | 0.00              | 1.0E+00                   | 8               | 0.50                | 2.1E-01                        |
| fat high resv   | liver low resv   | 0             | 0.00              | 1.0E+00                   | 0               | 0.00                | 1.0E+00                        |
| fat high resv   | muscle DR        | 0             | 0.00              | 1.0E+00                   | 0               | 0.00                | 1.0E+00                        |
| fat high resv   | muscle high resv | 0             | 0.00              | 1.0E+00                   | 36              | 0.48                | 2.8E-03                        |
| fat high resv   | muscle low resv  | 0             | 0.00              | 1.0E+00                   | 0               | 0.00                | 1.0E+00                        |
| fat low resv    | heart DR         | 0             | 0.00              | 1.0E+00                   | 7               | 0.32                | 4.8E-01                        |
| fat low resv    | heart high resv  | 0             | 0.00              | 1.0E+00                   | 0               | 0.00                | 1.0E+00                        |
| fat low resv    | heart low resv   | 0             | 0.00              | 1.0E+00                   | 14              | 0.07                | 8.2E-01                        |
| fat low resv    | liver DR         | 0             | 0.00              | 1.0E+00                   | 110             | 0.36                | 1.2E-04                        |
| fat low resv    | liver high resv  | 0             | 0.00              | 1.0E+00                   | 18              | 0.51                | 3.0E-02                        |
| fat low resv    | liver low resv   | 0             | 0.00              | 1.0E+00                   | 13              | -0.20               | 5.1E-01                        |
| fat low resv    | muscle DR        | 0             | 0.00              | 1.0E+00                   | 19              | 0.51                | 2.6E-02                        |
| fat low resv    | muscle high resv | 0             | 0.00              | 1.0E+00                   | 134             | 0.30                | 3.6E-04                        |
| fat low resv    | muscle low resv  | 0             | 0.00              | 1.0E+00                   | 0               | 0.00                | 1.0E+00                        |
| heart DR        | heart high resv  | 36            | 0.62              | 5.0E-05                   | 40              | 0.69                | 1.1E-06                        |
| heart DR        | heart low resv   | 0             | 0.00              | 1.0E+00                   | 42              | 0.67                | 1.0E-06                        |
| heart DR        | liver DR         | 0             | 0.00              | 1.0E+00                   | 24              | 0.14                | 5.2E-01                        |
| heart DR        | liver high resv  | 0             | 0.00              | 1.0E+00                   | 7               | -0.64               | 1.2E-01                        |
| heart DR        | liver low resv   | 0             | 0.00              | 1.0E+00                   | 0               | 0.00                | 1.0E+00                        |
| heart DR        | muscle DR        | 0             | 0.00              | 1.0E+00                   | 28              | 0.41                | 3.0E-02                        |
| heart DR        | muscle high resv | 0             | 0.00              | 1.0E+00                   | 10              | 0.38                | 2.8E-01                        |
| heart DR        | muscle low resv  | 14            | 0.34              | 2.4E-01                   | 0               | 0.00                | 1.0E+00                        |
| heart high resv | heart low resv   | 285           | 0.20              | 6.5E-04                   | 1992            | 0.36                | 1.5E-60                        |
| heart high resv | liver DR         | 0             | 0.00              | 1.0E+00                   | 0               | 0.00                | 1.0E+00                        |
| heart high resv | liver high resv  | 11            | 0.35              | 3.0E-01                   | 13              | 0.19                | 5.4E-01                        |
| heart high resv | liver low resv   | 0             | 0.00              | 1.0E+00                   | 0               | 0.00                | 1.0E+00                        |
| heart high resv | muscle DR        | 6             | -0.26             | 6.2E-01                   | 11              | -0.22               | 5.2E-01                        |
| heart high resv | muscle high resv | 0             | 0.00              | 1.0E+00                   | 24              | 0.36                | 8.6E-02                        |
| heart high resv | muscle low resv  | 52            | 0.49              | 1.9E-04                   | 9               | 0.48                | 1.9E-01                        |
| heart low resv  | liver DR         | 0             | 0.00              | 1.0E+00                   | 10              | 0.77                | 9.2E-03                        |
| heart low resv  | liver high resv  | 0             | 0.00              | 1.0E+00                   | 0               | 0.00                | 1.0E+00                        |

|                  |                  |      |       |          |      |       |          |
|------------------|------------------|------|-------|----------|------|-------|----------|
| heart low resv   | liver low resv   | 0    | 0.00  | 1.0E+00  | 10   | 0.09  | 8.0E-01  |
| heart low resv   | muscle DR        | 0    | 0.00  | 1.0E+00  | 8    | 0.71  | 4.7E-02  |
| heart low resv   | muscle high resv | 0    | 0.00  | 1.0E+00  | 31   | 0.33  | 6.6E-02  |
| heart low resv   | muscle low resv  | 11   | -0.07 | 8.3E-01  | 13   | 0.38  | 2.0E-01  |
| liver DR         | liver high resv  | 2806 | 0.58  | 1.1E-253 | 3046 | 0.56  | 2.4E-248 |
| liver DR         | liver low resv   | 341  | 0.31  | 3.1E-09  | 440  | 0.37  | 1.1E-15  |
| liver DR         | muscle DR        | 9    | 0.17  | 6.7E-01  | 23   | 0.26  | 2.3E-01  |
| liver DR         | muscle high resv | 0    | 0.00  | 1.0E+00  | 35   | 0.38  | 2.5E-02  |
| liver DR         | muscle low resv  | 0    | 0.00  | 1.0E+00  | 0    | 0.00  | 1.0E+00  |
| liver high resv  | liver low resv   | 611  | 0.43  | 2.9E-29  | 2132 | 0.51  | 1.4E-142 |
| liver high resv  | muscle DR        | 6    | 0.54  | 2.7E-01  | 7    | 0.07  | 8.8E-01  |
| liver high resv  | muscle high resv | 0    | 0.00  | 1.0E+00  | 19   | 0.54  | 1.6E-02  |
| liver high resv  | muscle low resv  | 0    | 0.00  | 1.0E+00  | 0    | 0.00  | 1.0E+00  |
| liver low resv   | muscle DR        | 8    | 0.07  | 8.7E-01  | 0    | 0.00  | 1.0E+00  |
| liver low resv   | muscle high resv | 0    | 0.00  | 1.0E+00  | 11   | -0.47 | 1.4E-01  |
| liver low resv   | muscle low resv  | 0    | 0.00  | 1.0E+00  | 0    | 0.00  | 1.0E+00  |
| muscle DR        | muscle high resv | 1188 | 0.37  | 1.4E-39  | 1641 | 0.41  | 1.2E-68  |
| muscle DR        | muscle low resv  | 650  | 0.38  | 2.5E-23  | 1460 | 0.36  | 1.9E-45  |
| muscle high resv | muscle low resv  | 1757 | 0.41  | 4.0E-73  | 2537 | 0.46  | 5.0E-135 |

## Pseudo Code For CORaL

### CORaL Pseudo Code

- Read in data
- Rank data
- Define list\_1\_set\_sizes as (step size) to (list length) by (step size)
- Define list\_2\_set\_sizes as (step size) to (list length) by (step size)
- Calculate matrix of ranked list overlaps, with element (i,j) being the overlap between the top (list\_1\_set\_sizes element i) in list 1 and the top (list\_2\_set\_sizes element j) in list 2
- For every possible combination of values in list\_1\_set\_sizes and list\_2\_set\_sizes
  - {
  - Calculate step p values using equations 2, 3 and 4; calculate for for 3 directions: up one step in both lists, up one step in list 1, up one step in list 2
  - }
- Correct all step p values with Benjamini-Yekutieli correction
- For every possible combination of values in list\_1\_set\_sizes and list\_2\_set\_sizes
  - {
  - Calculate T using equations 5 and 6. This can be done recursively, as T(list\_1\_set\_sizes index i, list\_2\_set\_sizes index j) depends on T(i-1, j-1), T(i-1, j) and T(i, j-1)
  - Calculate S using equation 7
  - Calculate L using equation 1
  - }
- Define chosen set size list 1 and chosen set size list 2 as the values of list\_1\_set\_sizes and list\_2\_set\_sizes such that the corresponding value of L is maximized.

## R Code for Plaisier Simulations

At the time of running simulations, the Plaisier group web site ([systems.crupp.ucla.edu/rankrank/](http://systems.crupp.ucla.edu/rankrank/)) was not available. We used the following code to calculate the maximum (Benjamini-Yekutieli corrected) Fisher's Exact Test p value. The code is written in the language of the statistical computing language R.

```
Plaisier_Simulations<-function(input_file_1,input_file_2,delta,output_name,m){
  data1<-read.table(input_file_1,sep="\t",quote="",header=F,colClasses="numeric")
  data2<-read.table(input_file_2,sep="\t",quote="",header=F,colClasses="numeric")
  N<-dim(data1)[1]
  nsim<-dim(data1)[2]
  ij<-matrix(0,nsim,2)
  kRecovered<-rep(0,nsim) #measures all overlap found
  kRecoveredStartOnly<-rep(0,nsim) #measures the original overlap genes
  kStats<-matrix(0,nsim,4)

  for(simCount in 1:nsim){
```



```

list1<-data1[,simCount]
list2<-data2[,simCount]
temp<-Plaisier_substitute_function(list1,list2,delta)
ij[simCount,]<-temp[1:2]
kRecovered[simCount]<-temp[3]
if(temp[1]>0){
  kRecoveredStartOnly[simCount]<-
length(intersect(list1[1:(delta*temp[1])],intersect(list2[1:(delta*temp[2])],1:m)))
}
if(temp[1]==0){
  kRecoveredStartOnly[simCount]<-0
}
}

summary<-matrix(0,N/delta,N/delta)
for(tempCount in 1:nsim){
  summary[ij[tempCount,1],ij[tempCount,2]]<-summary[ij[tempCount,1],ij[tempCount,2]] +
1
}

png(paste("Overlap_Histogram_",output_name,".png",sep=""))
hist(kRecovered)
dev.off()

print(c(mean(kRecovered),sqrt(var(kRecovered)),mean(kRecoveredStartOnly),sqrt(var(kRecoveredStartOnly))))

write.table(summary,paste("Simulation_Results_Summary",output_name,".txt",sep=""),sep="\t",quote=F,row.names=F,col.names=FALSE)
}

Plaisier_substitute_function<-function(list1,list2,delta){
  N<-length(list1)
  comparison_number<-seq(delta,N,delta)

  k<-matrix(0,length(comparison_number),length(comparison_number))
  pPlaisier<-matrix(0,length(comparison_number),length(comparison_number))

  for(i in 1:length(comparison_number)){
    for(j in 1:length(comparison_number)){
      k[i,j]<-
length(intersect(list1[1:comparison_number[i]],list2[1:comparison_number[j]]))
      pPlaisier[i,j]<-phyper(k[i,j]-1,comparison_number[i],N-comparison_number[i],comparison_number[j],lower.tail=F)
    }
  }
  pPlaisier_FDR_BY<-pPlaisier
  dim(pPlaisier_FDR_BY)<-NULL
  pPlaisier_FDR_BY<-p.adjust(pPlaisier_FDR_BY,method="BY")
  dim(pPlaisier_FDR_BY)<-dim(pPlaisier)
  ij<-which(pPlaisier_FDR_BY==min(pPlaisier_FDR_BY),arr.ind=TRUE)  k_ij<-k[ij[1],ij[2]]
  if(pPlaisier_FDR_BY[ij[1],ij[2]] > 0.05){
    k_ij<-0
    ij<-c(0,0)
  }

  return(c(ij[1],ij[2],k_ij))
}

```

```
}  
Plaisier_Simulations("m_400_n_400_list1_noise_0.txt", "m_400_n_400_list2_noise_0.txt", 50, "  
Plaisier_Noise_0", 400)  
Plaisier_Simulations("m_400_n_400_list1_noise_300.txt", "m_400_n_400_list2_noise_300.txt",  
50, "Plaisier_Noise_300", 400)
```
